# THE AMERICAN JOURNAL OF PSYCHIATRY

## En este número

A24

### Perspectivas

#### Editoriales

- 241 **Apoyo limitado de la eficacia de los tratamientos no farmacológicos de los principales síntomas del TDAH**  
Cathryn A. Galanter [Audio](#)
- 245 **La prevención de la esquizofrenia: ¿Un sueño imposible?**  
Judith L. Rapoport
- 248 **Trastorno disfórico premenstrual**  
C. Neill Epperson
- 253 **¿Por qué los niños con trastornos del comportamiento disruptivo constantemente se equivocan al elegir?**  
Essi Viding y Ana Seara-Cardoso

#### Tratamiento en Psiquiatría

- 256 **Telepsiquiatría: Videoconferencias en la prestación de atención psiquiátrica**  
Jay H. Shore [Audio](#) [Guías clínicas](#)

#### Imágenes en Psiquiatría

- 263 **Representando el trastorno de despersonalización**  
João Ricardo Mendes de Oliveira y Matheus Fernandes de Oliveira

#### Resúmenes y Reseñas

- 265 **El síndrome metabólico y anomalías metabólicas en el trastorno bipolar: Un meta-análisis de tasas de prevalencia y moderadores**  
Davy Vancampfort, Kristof Vansteelandt, Christoph U. Correll, Alex J. Mitchell, Amber De Herdt, Pascal Sienaert, Michel Probst, y Marc De Hert  
[Audio](#) [EMC](#) [Guías clínicas](#)

## Nuevas investigaciones

### Artículos

- 275 **Intervenciones no farmacológicas para el TDAH: Revisión sistemática y meta-análisis de ensayos controlados aleatorizados de tratamientos alimenticios y psicológicos**  
Edmund J.S. Sonuga-Barke, Daniel Brandeis, Samuele Cortese, David Daley, Maite Ferrin, Martin Holtmann, Jim Stevenson, Marina Danckaerts, Saskia van der Oord, Manfred Döpfner, Ralf W. Dittmann, Emily Simonoff, Alessandro Zuddas, Tobias Banaschewski, Jan Buitelaar, David Coghill, Chris Hollis, Eric Konofal, Michel Lecendreux, Ian C.K. Wong, Joseph Sergeant, y European ADHD Guidelines Group [Audio](#) [Editorial](#) [Guías clínicas](#)
- 290 **Efectos de la colina perinatal en la fisiopatología neonatal relacionados con un posterior riesgo de esquizofrenia**  
Randal G. Ross, Sharon K. Hunter, Lizbeth McCarthy, Julie Beuler, Amanda K. Hutchison, Brandie D. Wagner, Sherry Leonard, Karen E. Stevens, y Robert Freedman [Audio](#) [Editorial](#) [EMC](#)
- 299 **Uso de ISRS durante el embarazo y el riesgo de muerte fetal y mortalidad neonatal**  
Espen Jimenez-Solem, Jon Trærup Andersen, Morten Petersen, Kasper Broedbaek, Anders Rune Lander, Shoaib Afzal, Christian Torp-Pedersen, y Henrik E. Poulsen
- 305 **Anomalías de la función prefrontal dorsolateral en mujeres con trastorno disfórico premenstrual: un estudio de neuroimagen multimodal**  
Erica B. Baller, Shau-Ming Wei, Philip D. Kohn, David R. Rubinow, Gabriela Alarcón, Peter J. Schmidt, y Karen F. Berman [Audio](#) [Editorial](#) [EMC](#)
- 315 **Perturbación de medidas de valor esperado y señal de error de predicción en jóvenes con trastornos del comportamiento disruptivo durante una tarea de evitación pasiva**  
Stuart F. White, Kayla Pope, Stephen Sinclair, Katherine A. Fowler, Sarah J. Brislin, W. Craig Williams, Daniel S. Pine, y R. James R. Blair  
[Editorial](#)
- 324 **Comorbilidades y mortalidad en personas con esquizofrenia: Un estudio de una cohorte nacional en Suecia**  
Casey Crump, Marilyn A. Winkleby, Kristina Sundquist, y Jan Sundquist

**334 Cognición social y no social en trastorno bipolar y esquizofrenia: Niveles relativos de deterioro**

Junghee Lee, Lori Altshuler, David C. Glahn, David J. Miklowitz, Kevin Ochsner, y Michael F. Green

## Comunicados y actualizaciones

### Reseñas Bibliográficas

**342** Madness at the Theatre [La locura y el teatro]  
Systematic Psychiatric Evaluation: A Step-by-Step Guide to Applying the Perspectives of Psychiatry [Evaluación psiquiátrica sistemática: Una guía para aplicar las perspectivas de la psiquiatría paso a paso]

Clinical Manual of Child and Adolescent Psychopharmacology, Second Edition [Manual clínico de psicofarmacología en niños y adolescentes, Segunda edición]

Neuroimaging in Addiction [Neuroimagen en adicciones]

### 346 Libros Recibidos

### Otros temas de interés

**347** Educación Médica Continuada

**A14** Directivos de la American Psychiatric Association

**A16** Calendario

**A23** Contenidos del *British Journal of Psychiatry*

### Cubierta

Este número presenta dos artículos sobre aspectos del tratamiento psiquiátrico en relación con el embarazo. Ross et al. (p. 290) describen un tratamiento perinatal nuevo de un factor de riesgo de esquizofrenia, y Jimenez-Solem et al. (p. 299) investigan el riesgo de muerte fetal o mortalidad neonatal asociado a la exposición intrauterina a ISRS. Concepto de la cubierta de Wendy Taylor.

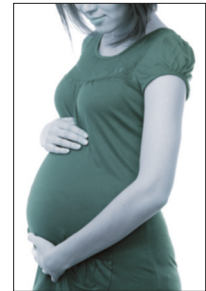

#### Audio

artículo en AJP Audio: archivo .mp3 descargable de [ajp.psychiatryonline.org](http://ajp.psychiatryonline.org)

#### Guías clínicas

este artículo ofrece guías clínicas (ver página "En este Número" o al final del artículo)

#### EMC

existe un curso en línea que cubre los contenidos de este artículo para los suscriptores del programa de cursos de EMC del AJP

#### Editorial

este artículo se discute en uno de los editoriales de este número

This issue's Spanish Table of Contents is presented in collaboration with the Office of Global Health, UMDNJ-Robert Wood Johnson Medical School

Translation courtesy of  
Sergi Casals, M.S.

*Garuna Editors (www.garunaeditors.com), Barcelona, Spain*

Carlos Lopez Jaramillo, M.D.  
*Universidad de Antioquia, Medellin, Colombia*

and

Javier I. Escobar, M.D., M.Sc.  
*UMDNJ-Robert Wood Johnson Medical School*
