# THE AMERICAN JOURNAL OF PSYCHIATRY

---

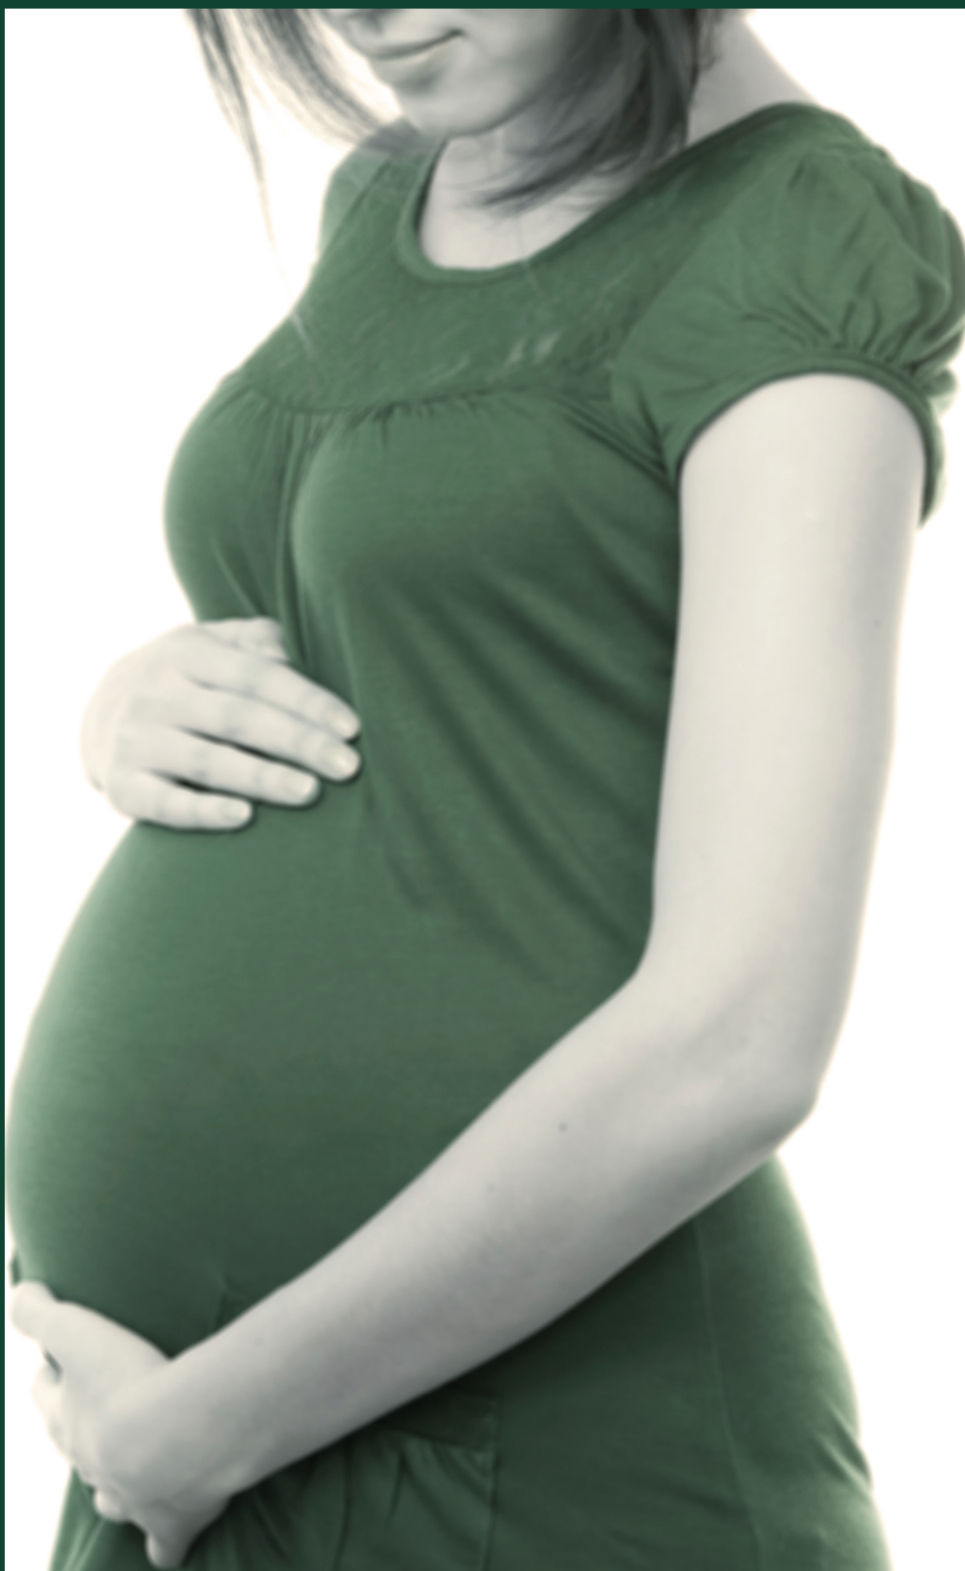

**Telepsychiatry: Videoconferencing  
in the Delivery of Psychiatric Care**

Jay H. Shore, M.D., M.P.H. 256

**Nonpharmacological Interventions  
for ADHD: Systematic Review and  
Meta-Analyses**

Edmund J.S. Sonuga-Barke, Ph.D., et al. 275

◀ **Perinatal Choline Effects on  
Neonatal Pathophysiology  
Related to Later  
Schizophrenia Risk**

Randal G. Ross, M.D., et al. 290

◀ **SSRI Use During Pregnancy and  
Risk of Stillbirth and Neonatal  
Mortality**

Espen Jimenez-Solem, M.D., et al. 299

**Continuing Medical Education** 347

**March 2013**

**Volume 170 • Number 3**

---

Official Journal of the  
AMERICAN PSYCHIATRIC ASSOCIATION

---

[ajp.psychiatryonline.org](http://ajp.psychiatryonline.org)
