# THE AMERICAN PSYCHIATRIC ASSOCIATION

1000 Wilson Blvd., Suite 1825, Arlington, VA 22209-3901  
(888) 357-7924 (toll-free inside the U.S. and Canada) / (703) 907-7300  
web site: [www.psych.org/](http://www.psych.org/) e-mail: [apa@psych.org](mailto:apa@psych.org)

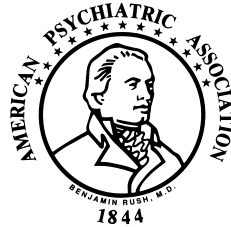

## OFFICERS 2012–2013

|                 |                            |
|-----------------|----------------------------|
| President       | Dilip V. Jeste, M.D.       |
| President-Elect | Jeffrey A. Lieberman, M.D. |
| Treasurer       | David Fassler, M.D.        |
| Secretary       | Roger Peele, M.D.          |

## ASSEMBLY

|               |                        |
|---------------|------------------------|
| Speaker       | R. Scott Benson, M.D.  |
| Speaker-Elect | Melinda L. Young, M.D. |
| Recorder      | Jenny L. Boyer, M.D.   |

## MEDICAL DIRECTOR'S OFFICE

|                          |                            |
|--------------------------|----------------------------|
| Medical Director and CEO | James H. Scully, Jr., M.D. |
|--------------------------|----------------------------|

## BOARD OF TRUSTEES

|                          |                            |
|--------------------------|----------------------------|
| Jeffrey Akaka, M.D.      | Judith F. Kashtan, M.D.    |
| Carol A. Bernstein, M.D. | Molly K. McVoy, M.D.       |
| Brian Crowley, M.D.      | James E. Ninninger, M.D.   |
| Jeffrey Geller, M.D.     | John M. Oldham, M.D.       |
| Marc David Graff, M.D.   | Alan F. Schatzberg, M.D.   |
| James A. Greene, M.D.    | Alik S. Widge, M.D., Ph.D. |

## PUBLISHER

Rebecca D. Rinehart

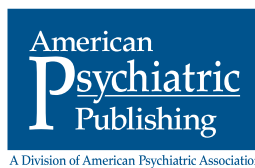

The American Journal of Psychiatry is online at [ajp.psychiatryonline.org](http://ajp.psychiatryonline.org)

THE AMERICAN PSYCHIATRIC ASSOCIATION  
Chairpersons of Councils, Commissions, Committees, and Task Forces

Standing Committees

**Bylaws**

Eric M. Plakun, M.D.

**Elections**

Robert E. Kelly, Jr., M.D.

**Ethics**

Richard D. Milone, M.D.

**Finance and Budget**

Frank W. Brown, M.D.

*Audit*

David Fassler, M.D.

*Investment Oversight*

Larry R. Faulkner, M.D.

**Joint Reference**

Jeffrey A. Lieberman, M.D.

**Membership**

Joseph Ezra V. Rubin, M.D.

**Nominating**

John M. Oldham, M.D.

**Tellers**

Tanya Nayyirah Alim, M.D.

**Council on Addiction Psychiatry**

John A. Renner, M.D.

**Council on Advocacy and Government Relations**

Robert Paul Cabaj, M.D.

*Advocacy and Litigation Funding*

Renee L. Binder, M.D.

**Council on Children, Adolescents, and Their Families**

Louis J. Kraus, M.D.

*Agnes Purcell McGavin Award*

*Blanche F. Ittleson Research Award*

Karen Dineen Wagner, M.D.

**Council on Communications**

Jeffrey A. Borenstein, M.D.

**Council on Geriatric Psychiatry**

Brent P. Forester, M.D.

**Council on Healthcare Systems and Financing**

Sul Ross Olen Thorward, M.D.

*Reimbursement for Psychiatric Care*

Bruce J. Schwartz, M.D.

*RBRVS, Codes and Reimbursement*

Ronald M. Burd, M.D.

**Council on Medical Education and Lifelong Learning**

Sandra Sexson, M.D.

*APA Public Psychiatry Fellowship Selection Committee*

Stephen M. Goldfinger, M.D.

*APA/SAMHSA Minority Fellowship Selection and Advisory*

Toi B. Harris, M.D.

*Scientific Program*

Joseph A. Cheong, M.D.

*Scientific Program Committee of the Institute on Psychiatric Services*

David Alan Pollack, M.D.

*Task Force to Update the Ethics Annotations*

Laura W. Roberts, M.D.

*Vestermark Award Committee*

Frederick G. Guggenheim, M.D.

**Council on Minority Health and Health Disparities**

Sandra C. Walker, M.D.

**Council on Psychiatry And Law**

Patricia R. Recupero, M.D., J.D.

*Isaac Ray/Human Rights Award*

Steven K. Hoge, M.D.

*Judicial Action*

Paul S. Appelbaum, M.D.

*Manfred S. Guttmacher Award*

Rebecca W. Brendel, M.D., J.D.

**Council on Psychosomatic Medicine  
(Consultation Liaison Psychiatry)**

Joel E. Dimsdale, M.D.

**Council on Research and Quality Care**

Joel Yager, M.D.

*Electronic Health Records*

Steven Roy Daviss, M.D.

*Psychiatric Dimensions of Disasters*

Robert J. Ursano, M.D.

*Research Awards*

Lewis L. Judd, M.D.

*Steering Committee on Practice Guidelines*

Joel Yager, M.D.

*Task Force on DSM-V*

David J. Kupfer, M.D.

*Task Force to Revise the Practice of Electroconvulsive Therapy*

Sarah H. Lisanby, M.D.

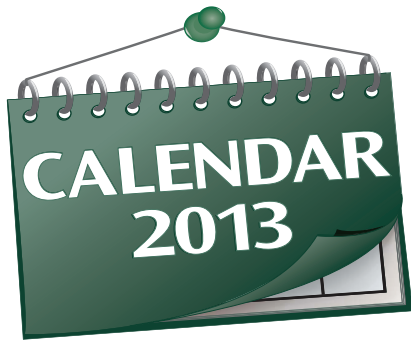

For free listing of your organization's official annual or regional meeting, please send us the following information: sponsor, location, inclusive dates, type and number of continuing education credits (if available), and the name, address, and telephone number of the person or group to contact for more information. In order for an event to appear in our listing, all notices and changes must be received at least 6 months in advance of the meeting and should be addressed to:

*Calendar, American Journal of Psychiatry, 1000 Wilson Boulevard, Suite 1825, Arlington, VA 22209-3901, [swestrade@psych.org](mailto:swestrade@psych.org) (e-mail).*

*Because of space limitations, only listings of meetings of the greatest interest to Journal readers may be included.*

---

## MARCH

**March 7–9**, 42nd Annual Meeting, American Association of Directors of Psychiatric Residency Training, Ft. Lauderdale, Fla. [www.aadprt.org](http://www.aadprt.org) (web site).

---

## APRIL

**April 3–6**, 24th Annual Meeting, American Neuropsychiatric Association, Boston, Mass. Contact: American Neuropsychiatric Association, 700 Ackerman Rd., Suite 625, Columbus, OH 43202; (614) 447-2077 (tel); e-mail: [anpa@osu.edu](mailto:anpa@osu.edu); [www.anpaonline.org](http://www.anpaonline.org) (web site).

---

## MAY

**May 18–22**, 166th Annual Meeting, American Psychiatric Association, San

Francisco, Calif. Contact: APA Annual Meetings Dept., 1000 Wilson Blvd, Suite 1825, Arlington, VA 22209; (703) 907-7815 (tel); <http://www.psych.org/learn/annual-meeting> (web site).

---

## JUNE

**June 6–9**, 4th World Congress on ADHD: From Childhood to Adult Disease, Milan, Italy. Contact Congress Organizer, +49-40-670 88 20 (tel); [adhd2013@cpo-hanser.de](mailto:adhd2013@cpo-hanser.de) (email); [www.adhd-congress.org](http://www.adhd-congress.org) (web site).

**June 20–22**, Association of Directors of Medical Student Education in Psychiatry meeting, Williamsburg Lodge, Williamsburg, Va. For registration information, go to [http://www.admsep.org/upcoming\\_meeting.php](http://www.admsep.org/upcoming_meeting.php).

---

## JULY

**July 8–13**, 28th International Congress of Applied Psychology, Palais des Congrès de Paris, France. Contact: [exh@icap2014.com](mailto:exh@icap2014.com) (email); [www.icap2014.com](http://www.icap2014.com) (web site).

---

## SEPTEMBER

**September 25–27**, 9th Congress of the International Neuropsychiatric Association, Chicago, Ill. [www.inawebsite.org](http://www.inawebsite.org) (web site).

---

## OCTOBER

**October 10–13**, 65th Institute on Psychiatric Services, Philadelphia, Pa. Contact: APA Annual Meetings Dept., 1000 Wilson Blvd, Suite 1825, Arlington, VA 22209; <http://www.psychiatry.org/learn/institute-on-psychiatric-services> (web site).

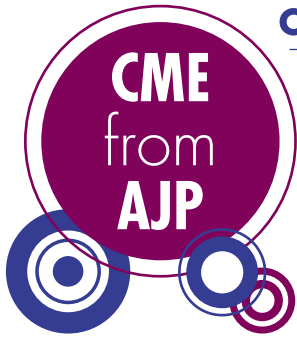

## Continuing Medical Education

Three articles in this issue form the basis of a short course with questions that can be answered for up to 1 *AMA PRA Category 1 Credit*<sup>™</sup> each by visiting <http://psychiatryonline.org/cme.aspx> and clicking on the “American Journal of Psychiatry” tab.

CME credit is issued only online, and a paid subscription to the AJP CME course program is required.

This month’s courses appear on pages 347–350.

FREE AUDIO!

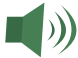

### Have You Heard?

You can listen to highlights of *The American Journal of Psychiatry* by downloading a monthly free .mp3 audio file from our web site (<http://ajp.psychiatryonline.org/audio.aspx#>) or by subscribing to the AJP Audio podcast at iTunes or other feed reader. Presented by Deputy Editor Dr. Susan Schultz or by Executive Editor Michael Roy, each month’s audio lasts approximately 30 minutes and covers several research articles, the Treatment in Psychiatry feature, and one or two editorials.

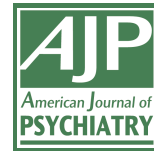

Coming in the April 2013 issue\*

## THE AMERICAN JOURNAL OF PSYCHIATRY

Sleep Disturbances as the Hallmark of PTSD: Where Are We Now?

A. Germain

Effect of a Nicotine Vaccine on Nicotine Binding to  $\beta_2^*$ -Nicotinic Acetylcholine Receptors In Vivo in Human Tobacco Smokers

I. Esterlis, J.O. Hannestad, E. Perkins, F. Bois, D.C. D’Souza, R.F. Tyndale, J.P. Seibyl, D.M. Hatsukami, K.P. Cosgrove, and S.S. O’Malley

Early Smoking Onset and Risk for Subsequent Nicotine Dependence: A Monozygotic Co-Twin Control Study

K.S. Kendler, J. Myers, M.I. Damaj, and X. Chen

Association Between Maternal Depressogenic Cognitive Style During Pregnancy and Offspring Cognitive Style 18 Years Later

R.M. Pearson, C. Fernyhough, R. Bentall, J. Evans, J. Heron, C. Joinson, A.L. Stein, and G. Lewis

\*Can’t wait? Visit [ajp.psychiatryonline.org/AJPinAdvance.aspx](http://ajp.psychiatryonline.org/AJPinAdvance.aspx) to see all articles uploaded in advance of print!



# The Residents' JOURNAL

**The Residents' JOURNAL** a publication of The American Journal of Psychiatry

January 2013 Volume 8 Issue 1

**Inside**

- 2 Complementary and Alternative Medicine: What Is It and What Does It Mean for Psychiatry? Nishi Bhopal, M.D.
- 5 Complementary and Alternative Medicine in Psychiatry Ijeoma Chukwu, M.D.
- 6 Melatonin as Treatment for Migraine Headaches and Nightmares in a Patient With PTSD and REM-Related Central Sleep Apnea Michael Seyffert, M.D. George C. Gettys, M.D.
- 9 Exercise: A Much Overlooked Treatment in Psychiatry Daniel M. Hochman, M.D.
- 10 An Encounter With Unconscious Communication as a Novice Therapist Shaneel Shah, M.D.
- 12 The American Board of Psychiatry and Neurology: Looking Back and Moving Ahead David Hsu, M.D.
- 13 Test Your Knowledge
- 14 Author Information and Upcoming Issue Themes

**In This Issue**



This issue of the *Residents' Journal* highlights the theme of complementary medicine. In her article, Nishi Bhopal, M.D., focuses on the history of complementary and alternative medicine and how they are maturing as specialties. Ijeoma Chukwu, M.D., discusses the rise of complementary medicine over the last two decades and how physicians have received limited training. In a case report, Michael Seyffert, M.D., and George C. Gettys, M.D., describe how melatonin provided relief in a posttraumatic stress disorder patient suffering from migraines and nightmares. Finally, Daniel M. Hochman, M.D., comments on the benefits of exercise for psychiatric conditions.

|                                             |                                                                                            |
|---------------------------------------------|--------------------------------------------------------------------------------------------|
| Editor-in-Chief<br>Monifa Seawell, M.D.     | Guest Section Editor<br>Nishi Bhopal, M.D.                                                 |
| Senior Editor<br>Sarah M. Fayad, M.D.       | Editors Emeriti<br>Sarah B. Johnson, M.D.<br>Molly McVoy, M.D.<br>Joseph M. Cerimele, M.D. |
| Associate Editor<br>Arshya Vahabzadeh, M.D. | Staff Editor<br>Angela Moore                                                               |

*The Residents' Journal* accepts manuscripts authored by medical students, resident physicians, and fellows. To submit your paper, please visit the manuscript submission site at [mc.manuscriptcentral.com/appi-ajp](http://mc.manuscriptcentral.com/appi-ajp) and either create an account or use your existing account. For manuscript type, select "Residents." Then follow the instructions to upload your manuscript. Residents who are interested in participating as Guest Section Editors should e-mail *The Residents' Journal* Editor-in-Chief Monifa Seawell at [mseawell@med.wayne.edu](mailto:mseawell@med.wayne.edu).

*The Residents' Journal* is sent free-of-charge to all psychiatry residents. Anyone interested in being included on the distribution list should contact Angela Moore, *The Residents' Journal* staff editor at [ajp@psych.org](mailto:ajp@psych.org) with "Subscribe to Residents' Journal" in the subject line.

To access the complete *Residents' Journal* archives, visit [ajp.psychiatryonline.org/residents\\_journal.aspx](http://ajp.psychiatryonline.org/residents_journal.aspx)

# The American Journal of PSYCHIATRY

4 of Journal Watch  
Psychiatry's  
10 "Top Stories of 2012"  
appeared in AJP!  
No other journal had  
multiple appearances!

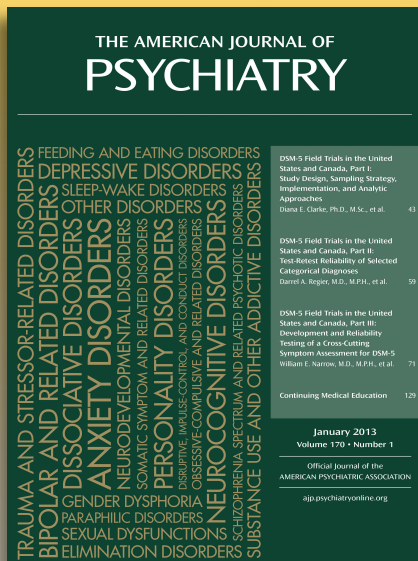

Official Journal of the  
American Psychiatric Association

Edited by Robert Freedman, M.D.

- *The American Journal of Psychiatry* (AJP) has an Impact Factor of 12.539 according to the 2011 Journal Citation Reports® (Thomson Reuters, 2012), placing it 2nd among the 129 journals in psychiatry while still remaining the far-and-away leader in total citations.
- *The American Journal of Psychiatry* is also the #2 journal in psychiatry in terms of immediacy according to Thomson Scientific's Immediacy Index. This important performance metric is calculated by dividing the number of citations to articles published in a given year by the number of articles published in that year.
- A poll conducted by the BioMedical & Life Sciences Division of The Special Libraries Association identified the 100 most influential journals in all of Biology & Medicine over the last 100 years. *The American Journal of Psychiatry* was among those honored, the only psychiatry/psychology journal represented.

Latest  
IMPACT FACTOR 12.539!

No other psychiatric journal reaches more psychiatrists with greater impact or immediacy than the one the overwhelming majority of psychiatrists considers essential: AJP.

ISSN 0002-953X • [ajp.psychiatryonline.org](http://ajp.psychiatryonline.org)  
To order a subscription, visit [www.appi.org](http://www.appi.org).

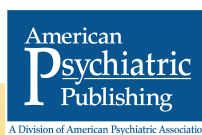

The *First* and *Last* Word in Psychiatry  
[www.appi.org](http://www.appi.org) • 1-800-368-5777 • 703-907-7322

Priority Code AH1303

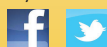



## Contents

- A5 Editorial Board  
A7 Highlights of this issue

### Editorials

- 81 **A call for a new positive psychiatry of ageing**  
D. V. Jeste and B. W. Palmer

- 83 **Karl Jaspers, *General Psychopathology* – reflection**  
David Goldberg

- 84 **Parental depression and the challenge of preventing mental illness in children**  
P. G. Ramchandani and S. E. Murphy

- 86 **Socioeconomic disadvantage and psychotherapy**  
G. N. Meadows and A. T. Tylee

- 88 **Vsevolod Mikhailovich Garshin – fallen stars**  
Raymond Cavanaugh Jr

- 89 **Effectiveness of cognitive analytic therapy for personality disorders**  
R. Mulder and A. M. Chanen

### Reappraisal

- 91 **When the drugs don't work: the potential of glutamatergic antipsychotics in schizophrenia**  
E. Papanastasiou, J. M. Stone and S. Shergill

### Review articles

- 94 **Prevalence of experiences of domestic violence among psychiatric patients: systematic review**  
S. Oram, K. Trevillion, G. Feder and L. M. Howard
- 100 **Vitamin D deficiency and depression in adults: systematic review and meta-analysis**  
R. E. S. Anglin, Z. Samaan, S. D. Walter and S. D. McDonald

### Papers

- 108 **Risk of psychopathology in adolescent offspring of mothers with psychopathology and recurrent depression**  
R. Sellers, S. Collishaw, F. Rice, A. K. Thapar, R. Potter, B. Mars, G. T. Harold, D. J. Smith, M. J. Owen, N. Craddock and A. Thapar
- 115 **Socioeconomic inequalities in common mental disorders and psychotherapy treatment in the UK between 1991 and 2009**  
M. Jokela, G. D. Batty, J. Vahtera, M. Elovainio and M. Kivimäki
- 121 **Cost-effectiveness analyses for mirtazapine and sertraline in dementia: randomised controlled trial**  
R. Romeo, M. Knapp, J. Hellier, M. Dewey, C. Ballard, R. Baldwin, P. Bentham, A. Burns, C. Fox, C. Holmes, C. Katona, C. Lawton, J. Lindsay, G. Livingston, N. McCrae, E. Moniz-Cook, J. Murray, S. Nurock, J. O'Brien, M. Poppe, A. Thomas, R. Walwyn, K. Wilson and S. Banerjee

- 128 **Shoplifting – in 100 words**  
Martin S. Humphreys

- 129 **Cognitive analytic therapy for personality disorder: randomised controlled trial**  
S. Clarke, P. Thomas and K. James

- 135 **Internet-delivered cognitive-behavioural therapy v. conventional guided self-help for bulimia nervosa: long-term evaluation of a randomised controlled trial**  
G. Wagner, E. Penelo, C. Wannier, P. Gwinner, M.-L. Trofaiet, H. Imgart, K. Waldherr, Ç. Wöber-Bingöl and A. F. K. Karwautz

- 142 **Impact of the physical environment of psychiatric wards on the use of seclusion**  
P. S. van der Schaaf, E. Dusseldorp, F. M. Keuning, W. A. Janssen and E. O. Noorthoorn

- 149 **Ice – poem**  
John Exell

### Columns

- 150 **Lateral reading**  
152 **Correspondence**  
156 **Corrections**  
157 **Book reviews**  
160 **Contents of *Advances in Psychiatric Treatment***  
161 **Contents of the *American Journal of Psychiatry***  
162 **From the Editor's desk**

### Cover picture

*She Hears Sea* (self-portrait, 2012), by Eleanor Bennett (b.1996).

Eleanor Leonne Bennett is an internationally award-winning artist. Her photography has been published in the *Telegraph*, *Guardian*, on the BBC News website and on the cover of books and magazines in the USA and Canada. Her art is also globally exhibited. She writes: 'I have OCD and have done from around the age of 11 when a close friend of mine contracted terminal cancer. It was a sort of self-bargaining to make things right. I am not a logical person, more passionate than anything. With my obsessive behaviour I have tried to refocus it into the direction of art. Recently I have exhibited in Argentina, Denmark and in Buxton (UK) at the Devonshire Dome at the poetry festival. When I was 15, I started collaborative work on my first photo book with the Australian poet, Scott Patrick Mitchell. I have met and collaborated with some amazing people. I have only been taking photos for around 4 years. Before that I had won two national art competitions with the Woodland Trust'.

We are always looking for interesting and visually appealing images for the cover of the *Journal* and would welcome suggestions or pictures, which should be sent to Dr Allan Beveridge, British Journal of Psychiatry, 17 Belgrave Square, London SW1X 8PG, UK or [bjp@rcpsych.ac.uk](mailto:bjp@rcpsych.ac.uk).

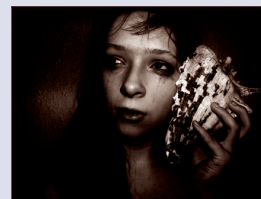

Source: https://psychiatryonline.org/doi/suppl/10.1176/ajp.2013.170.issue-3/suppl_file/front.pdf
